## Past, present, and future of the Living Planet Index

Sophie E H Ledger<sup>1\*</sup>, Louise McRae<sup>1\*</sup>, Jonathan Loh<sup>2</sup>, Rosamunde Almond<sup>3</sup>, Monika Böhm<sup>4</sup>, Chris Clements<sup>5</sup>, Jessica Currie<sup>6</sup>, Stefanie Deinet<sup>1</sup>, Thomas Galewski<sup>7</sup>, Monique Grooten<sup>3</sup>, Martin Jenkins, Valentina Marconi<sup>1</sup>, Brett Painter<sup>8</sup>, Kate Scott-Gatty<sup>1</sup>, Lucy Young<sup>9</sup> and Robin Freeman<sup>1</sup>

<sup>1</sup> Institute of Zoology, Zoological Society of London (ZSL), London, UK

<sup>2</sup> School of Anthropology and Conservation, University of Kent, Canterbury, UK

<sup>3</sup> WWF Netherlands – World Wide Fund for Nature (Formerly World Wildlife Fund), Zeist, Netherlands

<sup>4</sup> Global Center for Species Survival, Indianapolis Zoo, Indianapolis, USA

<sup>5</sup> School of Biological Sciences, University of Bristol, Bristol, UK

<sup>6</sup> WWF Canada – World Wildlife Fund for Nature (Formerly World Wildlife Fund), Canada, Toronto, Canada

<sup>7</sup> Institut de recherche pour la conservation des zones humides méditerranéennes, Tour du Valat, Arles, France

<sup>8</sup> Environment and Climate Change Canada (ECCC), Government of Canada, Canada

<sup>9</sup> WWF UK – World Wide Fund for Nature (Formerly World Wildlife Fund), Cambridge, UK

\* *Joint first and corresponding authors:* [sophie.ledger@ioz.ac.uk](mailto:sophie.ledger@ioz.ac.uk); [louise.mcrae@ioz.ac.uk](mailto:louise.mcrae@ioz.ac.uk)

### Abstract

As we enter the next phase of international policy commitments to halt biodiversity loss (e.g. Post-2020 Biodiversity Framework), biodiversity indicators will play an important role forming the robust basis upon which targeted, and time sensitive conservation actions are developed. Population trend indicators are perhaps the most powerful tool in biodiversity monitoring due to their responsiveness to changes over short timescales and their ability to aggregate species trends from global down to at a sub-national or even local scale. We consider how the project behind the foremost population level indicator - the Living Planet Index - has evolved over the last 25 years, its value to the field of biodiversity monitoring, and how its components have portrayed a compelling account of the changing status of global biodiversity through its application at policy, research and practice levels. We explore ways the project can develop to enhance our understanding of the state of biodiversity and share lessons learned to inform indicator development and mobilise action.

## Box 1. The Living Planet Index Project

The Living Planet Index project (the index, methodology, and database) and its secondary outputs (methods papers and R code, database and website, global index, and subset indices) have had wide-ranging applications within the fields of biodiversity monitoring and research, as well as across policy, education, and outreach.

The Living Planet Index (LPI) is a biodiversity indicator which tracks trends in the relative abundance of wild vertebrate populations (where population is defined as to a single species in a defined location rather than the biological definition). Relative abundance captures how populations are changing over time on average in comparison to a reference point, or “baseline” (the LPI uses 1970). It is often described as analogous to a stock market index for species. The index is comprised of thousands of population time-series for vertebrate species from locations around the world; the trends from these populations are averaged to produce terrestrial, freshwater, and marine indices, which are further aggregated to a global LPI. The latest global LPI shows a decline of 68% between 1970 and 2016 globally <sup>1</sup>. This is an average trend based on time-series data from 20,811 populations of 4,392 species of mammals, birds, reptiles, amphibians, and fish.

The LPI database includes population data for any species for which time-series population data could be found, regardless of threat status, or whether they show increasing or declining trends. These population time-series are sourced from scientific papers, online databases, government, and expert led published reports. They can be searched and downloaded from the project website ([www.livingplanetindex.org](http://www.livingplanetindex.org)). More technical information is available on the LPI stats website (<http://stats.livingplanetindex.org/>).

37

## 38 Introduction

39 The Living Planet Index (LPI) (Box 1) was first proposed as a means of evaluating environmental change,  
40 particularly by tracking trends in global biodiversity, a quarter of a century ago <sup>2</sup>. At that time, although there  
41 was mounting evidence of anthropogenic impacts on nature <sup>3</sup>, there were very few indicators of the state of  
42 biodiversity or ecosystems at a global, or even regional scale. The initial version of the LPI, based on  
43 trends in vertebrate populations and forest cover, indicated that biodiversity was in decline globally <sup>2</sup>. A  
44 successful response to what is now widely recognised as a global biodiversity crisis <sup>4-7</sup> will involve  
45 transformative changes in the way humans use the planet’s resources,<sup>8-10</sup> widespread intergovernmental  
46 action <sup>11</sup> and ambitious targets <sup>9,10</sup> (intergovernmental agreements such as the Convention on Biological  
47 Diversity (CBD) <sup>12</sup> and the United Nations Sustainable Development Goals (SDGs) <sup>13</sup>). To this end we need  
48 meaningful and reliable biodiversity indicators, generated from high quality and large-scale data to track  
49 progress towards targets down to the national level <sup>10,14</sup>. As such, the development of biodiversity indicators  
50 has become an increasing focus in conservation science <sup>15-17</sup>, particularly to ensure they are fit for purpose  
51 as tools for management and policy, as well as to improve the representation of the underlying data beyond  
52 well-studied taxa and regions.

53 Within this review we chart the history, progression, and applications of the LPI project (Box 1). We review  
54 the LPI as a tool for public engagement and outreach, policy, and to drive further research and, analyse  
55 citation data to explore other applications of the LPI. We discuss challenges faced in maintaining a large  
56 biodiversity dataset and in current uses of the LPI. Finally, we look to the future and propose how the LPI  
57 project could evolve by enabling global collaboration to strengthen the indicator, harnessing new  
58 technologies for collecting population data, and developing new analysis to better understand the  
59 relationships between drivers and wildlife population trends.

60

## 61 The origins and development of the Living Planet Index

62 The Living Planet Index was conceived in 1997 by the World Wildlife Fund for Nature (WWF International).  
63 The primary aim was to “*develop a measure of the changing state of the world’s biodiversity over time*”<sup>18</sup>  
64 using aggregate time-series population trends for a large sample of species from across the world. As very  
65 little data were available on plants, fungi or invertebrate species, the pragmatic approach was taken to  
66 restrict the initial LPI taxonomically to vertebrates. There was also geographic unevenness in the  
67 distribution of the available data: long-term monitoring studies dating back decades were located mainly in  
68 Europe and North America. To address the biases in data coverage, a benchmark of 1970 was set, and the  
69 data were divided up into three broad biomes – terrestrial, freshwater and marine – and then further into  
70 regional groupings. The source data and LPI outputs were at first collaboratively managed by WWF and the  
71 World Conservation Monitoring Centre (now UN Environment Programme WCMC) for use within WWF’s  
72 flagship publication, the Living Planet Report (LPR). First published in 1998, the LPR used the initial  
73 iteration of the LPI as a communications tool to convey biodiversity trends into a singular message on the  
74 health of the planet for a broad audience, alongside measures of humanity’s impact on the planet<sup>2</sup>.  
75 Calculated as -32% between 1970 and 1995 (Loh, et al.<sup>2</sup>), the downward trend of the LPI was already  
76 apparent.

77  
78 In the early 2000’s, as the LPI dataset and methods were developed further<sup>18</sup>, their potential for use in  
79 advocacy, research, and as an indicator for monitoring biodiversity were recognised more widely. In 2002,  
80 the Parties to the CBD committed to achieve a significant reduction of the rate of biodiversity loss at the  
81 global, regional and national level by 2010 and required a framework of biodiversity indicators to monitor  
82 their progress<sup>19</sup>. The first national LPI, the ‘Living Uganda Index’, was published with the National  
83 Biodiversity Data Bank recording scheme at Makerere University, Uganda in 2004<sup>20,21</sup> and was presented  
84 as a case study for country-level applications of species population indices at CBD COP 7<sup>22</sup>. A Discussion  
85 Meeting held at the Royal Society in 2004 brought together leading academic and NGO researchers  
86 working on biodiversity indicators, and the resulting papers, including one on the LPI, were published in a  
87 special issue of Philosophical Transactions B<sup>23</sup>. This meeting laid much of the groundwork for subsequent  
88 indicator development in the context of the CBD and other international biodiversity monitoring processes  
89<sup>24</sup>. In 2005, the Convention’s scientific advisory body adopted the LPI metric as part of a suite of biodiversity  
90 indicators, deployed to monitor progress towards that target<sup>25</sup>. In 2010, the CBD Parties agreed a further  
91 set of biodiversity targets, the Aichi Targets, for the period 2011 to 2020<sup>4</sup> and the LPI was identified as an  
92 indicator for several of these.

93  
94 To strengthen the LPI’s scientific foundations and improve its capacity as an indicator for tracking progress  
95 towards international biodiversity policy targets, an in-depth peer-reviewed paper on the methodology was  
96 published<sup>18</sup> and the current partnership between WWF and the Zoological Society of London (ZSL) was  
97 subsequently formed in 2006. Since then, two updates to the methodology behind the global index have  
98 been published<sup>26,27</sup> and the research potential of the LPI data has expanded by incorporating metadata on  
99 ecology, geography, threats and management into the database, the core data of which were made openly  
100 accessible online in 2013 (18% of the data set is not available due to a confidentiality clause in the data  
101 sharing agreement, often for rare or threatened species).

## 102 Applications of the LPI

103 Here we provide an overview of the uses of the different LPI project elements (see Box 1) and outputs,  
104 grouped into three themes: public engagement and advocacy, policy and research.

### 105 1. *The LPI as a communication tool for public engagement and advocacy.*

106 From its inception, the LPI was seen as a powerful tool and WWF communications found that it  
107 resonated with the public better than any other conservation messages at that time. The LPI helps  
108 to set the scene for the state of global biodiversity by conveying a complex topic as a singular  
109 takeaway message for a broad audience. The key conduit for the global LPI has been as the  
110 headline biodiversity indicator within the Living Planet Report (LPR). The LPR is an open access,

111 biennial publication of the latest research and insights into global biodiversity trends, the human  
112 drivers behind them, and proposed solutions to halt biodiversity loss and “bend the curve”<sup>10</sup> back  
113 towards restoration. Its widespread distribution and WWF’s communications expertise have  
114 provided a regular global media platform and, emphasizing opportunities for awareness raising and  
115 advocacy regarding the biodiversity crisis. The 13<sup>th</sup> edition, published in 2020, was translated into  
116 16 languages and circulated around the world, with over 290 million social media views and 3,560  
117 mentions from monitored global news outlets within the first month of its launch<sup>28</sup>. The consistent  
118 use and media exposure within the LPR has accorded the LPI with familiarity within the public realm  
119 (see communication and interpretation of the LPI section). An analysis of online posts and articles  
120 (in English) containing the LPR 2020’s keywords or hashtags showed that 51% mentioned the 2020  
121 global LPI statistic<sup>28</sup>. Apart from global LPI figures, analysis of subset indices such as those  
122 featured in the LPR 2020 (LPI by IPBES regions, taxonomic focus (e.g. reptiles) and ecological  
123 biome (e.g. forests and freshwater)) have been used to draw focus towards trends within different  
124 species groups<sup>5,29,30</sup>.

125 Both the underlying data in the LPI and the global results have been used in several educational  
126 formats, in schools and higher education. As part of the latest LPR outreach campaign, a youth  
127 edition including the LPI trends was prepared<sup>31</sup> and adapted by WWF country offices to enable  
128 young people to learn from the report’s key messages and promote engagement of schools globally  
129 in biodiversity issues.

130 Nature documentaries provide another medium for large-scale biodiversity outreach<sup>32</sup>. The 2019  
131 Netflix series “Our Planet,” narrated by Sir David Attenborough, used the global LPI statistic from  
132 LPR 2018 to set the scene for its narrative alongside other headline biodiversity indicators and,  
133 within the first month of the launch, was viewed by 45 million accounts across the world<sup>33</sup>.

134 National scale LPI analysis and LPRs such as those undertaken by WWF offices in Belgium<sup>34</sup>, the  
135 Netherlands<sup>35</sup> and Canada<sup>36</sup>, and regional approaches like the 2013 “Wildlife Comeback in  
136 Europe” report<sup>37</sup> have used LPI figures to illustrate species trends and raise public awareness to  
137 what is happening to status and trends of the biodiversity on their doorstep. The Wildlife Comeback  
138 report reached 138 million people across Europe and worldwide<sup>38</sup>.

## 140 2. *The use of the LPI project within policy*

141 Analyses of the LPI dataset and trends within a geopolitical, ecological or taxonomic focus have  
142 been used to provide evidence of biodiversity change for policy makers, fed into policy and target  
143 development, and monitored progress towards those targets. The LPI is part of a suite of  
144 biodiversity indicators adopted by the CBD, measuring trends in relative abundance of vertebrates  
145 and deployed to monitor progress towards the 2010 Biodiversity Target<sup>19</sup>, subsequent 2020 Aichi  
146 targets<sup>4</sup>, and is one of the indicators within Goal A of the Post-2020 Biodiversity Monitoring  
147 Framework<sup>39</sup>. As a measure of population trends compiled at annual intervals, the LPI is sensitive  
148 enough to detect annual changes, which is of value for informing policy<sup>15</sup> and evaluating the impact  
149 of conservation interventions<sup>40,19</sup>.

150 ZSL and WWF joined the Biodiversity Indicators Partnership (BIP) in 2007 to further develop the LPI  
151 and make it available for use under the CBD strategic plan. This resulted in the use of the LPI as  
152 evidence of biodiversity decline in international policy documents (Table 1): global and regional  
153 assessments (Millennium Ecosystem Assessment (2005)<sup>41</sup>, IPBES global, regional and thematic  
154 assessments<sup>7,42-45</sup> and successive updates of UN Global Environment Outlook<sup>25,46-49</sup> and UN  
155 Global Biodiversity Outlook<sup>50-53</sup>) as well as thematic assessments (Ramsar Convention on  
156 Wetlands, (2018)<sup>54</sup>, Mediterranean Wetlands Outlooks (2012 and 2018)<sup>55,56</sup>, the Convention on  
157 Migratory Species reports (CMS) (2008 and in 2019)<sup>57,58</sup> and Arctic Biodiversity Assessment (2013)  
158<sup>59</sup>). More recently, the global and regional indices were used to illustrate the state of nature and how  
159 this varies geographically as part of the evidence base for the Dasgupta review, an independent  
160 report on the economics of biodiversity<sup>60</sup>.

161 LPIs have been used as a scientific basis and in their scene setting capacity, to influence policy  
162 development when advocating for transformative change and setting ambitious biodiversity targets



163  
164  
165  
166

<sup>9,10</sup>. The global LPI statistic has featured in high-level biodiversity discussions, for example within Volkan Bozkir's (President of the UN General Assembly) speech to heads of state at the 75<sup>th</sup> UN Summit on Biodiversity in 2020 and within UK parliament in 2016 to support an Early Day Motion on Global Biodiversity <sup>61</sup>.

167  
168  
169  
170  
171  
172  
173  
174  
175  
176  
177

The LPI dataset and guidance on applying the method at a sub-global scale <sup>62</sup> have allowed for regional, national and in some areas, sub-national scale analysis (Table 1). This 'scalability' is a key requirement for indicators to be effective at tracking progress of signatory parties towards larger intergovernmental targets <sup>62,63</sup>. CBD parties, for example, can develop national LPIs to fulfil part of their progress reporting requirements within their National Biodiversity Strategy and Action Plans (NBSAP) <sup>3</sup>. Several members, including the Netherlands, Uganda, Canada, and China have provided LPI analysis of species trends within their NBSAP reports. In France, this process has been scaled down even further and; provinces such as Provence-Alpes-Côte d'Azur have used LPI analysis to track progress towards their National Biodiversity Strategy <sup>64</sup>. In Australia, a new application of the LPI method focussed on threatened species to monitor their national progress towards Aichi Target 12 (extinction prevented) <sup>65</sup>.

178  
179  
180  
181  
182  
183  
184  
185

Aside from tracking CBD commitments, nations have adapted the LPI method and applied it to suit their state biodiversity indicator needs such as the "Canadian Species Index," developed by ZSL in partnership with Environment and Climate Change Canada (ECCC) <sup>66,67</sup>. The package in the programming language "R" for calculating the LPI (rspi), is freely available via GitHub <sup>68</sup>, and has been used by collaborators from around the world to produce their own regional and national indices e.g. national and scientific agencies within Brazil use it within a national bird and mammal monitoring programme <sup>69</sup>.

| Application of the LPI                                                                                                                                                             | Corresponding biodiversity and sustainable development targets and other multilateral environmental agreements (MEAs) |                                                                                       |                                                                                       |
|------------------------------------------------------------------------------------------------------------------------------------------------------------------------------------|-----------------------------------------------------------------------------------------------------------------------|---------------------------------------------------------------------------------------|---------------------------------------------------------------------------------------|
| <i>Disaggregation and reference</i>                                                                                                                                                | CBD                                                                                                                   | SDG                                                                                   | MEAs                                                                                  |
| <b>Sub national</b>                                                                                                                                                                |                                                                                                                       |                                                                                       |                                                                                       |
| LPI-Cat, State of Nature in Catalonia 2020 report for Catalunya, Spain. <sup>70</sup>                                                                                              |                                    |  |  |
| Indice Région Vivante (IRV), province of Provence-Alpes-Côte d'Azur, France. <sup>64</sup>                                                                                         |                                    |  |  |
| Indice Région Vivante (IRV), bird indicator for the province of Franche-Comté, France. <sup>71</sup>                                                                               |                                    |  |  |
| <b>National</b>                                                                                                                                                                    |                                                                                                                       |                                                                                       |                                                                                       |
| Living Uganda Index (LUI), Uganda. <sup>21,72-75</sup>                                                                                                                             |                                    |  |  |
| Living Planet Index or Naturindeks for Norge, Norway. <sup>76</sup>                                                                                                                |                                    |  |  |
| Canadian Species Index (CSI), one of a suite of Canadian Environmental Sustainability Indicators, Canada. <sup>67,77</sup> The Canadian Living Planet Index (C-LPI). <sup>36</sup> |                                    |  |  |
| Living Planet Index Netherlands, the Netherlands. <sup>78,79</sup>                                                                                                                 |                                    |  |  |
| Living Planet Index, China. <sup>80 81</sup>                                                                                                                                       |                                    |  |  |
| Belgian Living Planet Index, Belgium. <sup>34</sup>                                                                                                                                |                                    |  |  |
| Threatened Species Index (TSX), for birds, Australia. <sup>65</sup>                                                                                                                |                                    |  |  |
| The Austrian Living Planet Index, Austria. <sup>82</sup>                                                                                                                           |                                    |  |  |
| <b>Regional</b>                                                                                                                                                                    |                                                                                                                       |                                                                                       |                                                                                       |
| Arctic Species Trend Index (ASTI) for vertebrates across the Arctic <sup>59,83,84</sup>                                                                                            |                                   |  |  |

|                                                                                                      |  |  |          |
|------------------------------------------------------------------------------------------------------|--|--|----------|
| ASTI for Arctic marine mammals, birds and fish <sup>85</sup>                                         |  |  |          |
| Arctic Migratory Birds Index <sup>86</sup>                                                           |  |  | <br>     |
| Mediterranean wetlands Living Planet Index <sup>55,56,87</sup>                                       |  |  | <br>     |
| European marine vertebrates Living Planet Index, European Environment Agency (EEA) <sup>88</sup>     |  |  |          |
| <b>Ecological</b>                                                                                    |  |  |          |
| Living Planet Index for global estuarine systems <sup>89</sup>                                       |  |  | <br>     |
| Living Planet Index for migratory species <sup>58,90</sup>                                           |  |  | <br>     |
| Living Planet Index by marine, freshwater and terrestrial biomes <sup>54,91</sup>                    |  |  | <br>     |
| Living Planet Index for Reptiles <sup>92</sup>                                                       |  |  |          |
| Living Planet Index for freshwater megafauna <sup>93</sup>                                           |  |  | <br><br> |
| Living Planet Index for migratory freshwater fish <sup>94</sup>                                      |  |  | <br><br> |
| Forest Specialists Index <sup>95</sup>                                                               |  |  |          |
| <b>Conservation management and species utilisation</b>                                               |  |  |          |
| Protected areas and protected area management <sup>96-99</sup>                                       |  |  |          |
| Impacts of conservation management on species <sup>40</sup> and threatened species <sup>36,100</sup> |  |  |          |
| Living Planet Index for recovering populations of European mammals and birds <sup>37</sup>           |  |  |          |
| Living Planet Index for utilized species <sup>101,102</sup>                                          |  |  | <br>     |
| Trends in target and bycatch species (oceanic sharks and rays) <sup>103</sup>                        |  |  |          |
| <b>Other influences of the LPI</b>                                                                   |  |  |          |
| Index of Linguistic Diversity <sup>104,105</sup>                                                     |  |  |          |
| The Wetland Extent Trends Index <sup>106,107</sup>                                                   |  |  | <br>     |
| Sustainability Policy Transparency Toolkit (SPOTT) Index <sup>108</sup>                              |  |  |          |
| The Species Awareness Index (SAI) <sup>109</sup>                                                     |  |  |          |

**Table 1. Selected applications of the LPI data and/or method and the corresponding and suggested uses for tracking global conventions on biodiversity, sustainable development, and other multilateral environmental agreements (MEAs).** Sourced from: UNEP (United Nations Environment Programme) <sup>12</sup>; UN <sup>13</sup>; UNEP-WCMC (UN Environment Programme World Conservation Monitoring Centre) <sup>110</sup>. The Post-2020 Biodiversity Framework targets were not finalised at the point of submission and are not included.

186  
187  
188  
189  
190

191 3. *The LPI project as a tool for research*

192 The LPI methods, dataset and metrics have been used either individually or in unison for numerous  
193 research projects around the world (Table 1 and Figure 1). Within a random sample of 341 citations  
194 containing the term “Living Planet Index,” 90% of author and document affiliation was classed as  
195 research (academic institution or university); of the outputs themselves, 53% were within academic  
196 journals (Supplementary Materials A and B).

197 The Living Planet Database (LPD) (except for about 18% of the data marked as confidential – see  
198 the origins and development of the Living Planet Index) has been publicly available since 2013  
199 when the LPI website was created to facilitate viewing and downloading the data. Prior to this,  
200 subsets of the database were shared upon request. The LPD is now the largest repository of  
201 vertebrate population trend data (containing over 38,000 populations of more than 5,000 species at  
202 the time of writing), adding to a wealth of available biodiversity data for species occurrence (GBIF  
203 <sup>111</sup>), species extinction risk (IUCN Red List <sup>112</sup>) and ecological community data (PREDICTS <sup>113</sup>,  
204 BioTIME <sup>114</sup>). To date, [www.livingplanetindex.org](http://www.livingplanetindex.org) has had over 6,000 registered users from 145  
205 countries around the world.

206 Within the LPD, the population and ancillary data (Supplementary Materials D Figure 5) have  
207 facilitated a wide range of research topics (Table 1). In particular, the threat and management data  
208 at population-level allows for more fine-grained analysis compared with using species-level data.  
209 Recent applications of the data include: measuring the effectiveness of protected areas <sup>96-98</sup>;  
210 evaluating the correlates of abundance trends in subsets of species such as mammals, reptiles,  
211 forest specialists, freshwater megafauna and migratory species <sup>90,92,93,95,115</sup>; the nature of population  
212 dynamics in response to threats or management <sup>99-101,116,117</sup>; the effects of land use and climate on  
213 species <sup>118</sup> and exploring linkages between human development variables and wildlife population  
214 trends <sup>119</sup>.

215 The LPD has been incorporated into an open access repository at the University of Edinburgh,  
216 dedicated to providing free online courses in statistics for ecology and environmental scientists <sup>120</sup>.  
217 In a more informal setting, LPI data have been used to present challenges for data visualisation or  
218 analysis as part of Hackathons, one of which led to the development of a tool to automatically  
219 identify papers containing abundance data <sup>121</sup>.

220 The framework used to calculate the LPI has been applied to produce other metrics and not just  
221 biodiversity. Conceptually, relative change, as calculated by the geometric mean, can be applied to  
222 other units of measurement that have been collected consistently over time. Using the code for  
223 calculating the LPI, new indicators have been developed for wetland areas <sup>106,107</sup>, linguistic diversity  
224 <sup>104</sup>, monitoring environmental, social and governance transparency in palm oil production <sup>108</sup> and  
225 biodiversity awareness <sup>109</sup>, of which the first two of these are part of the ongoing suite of indicators  
226 for the CBD (Table 1).

227

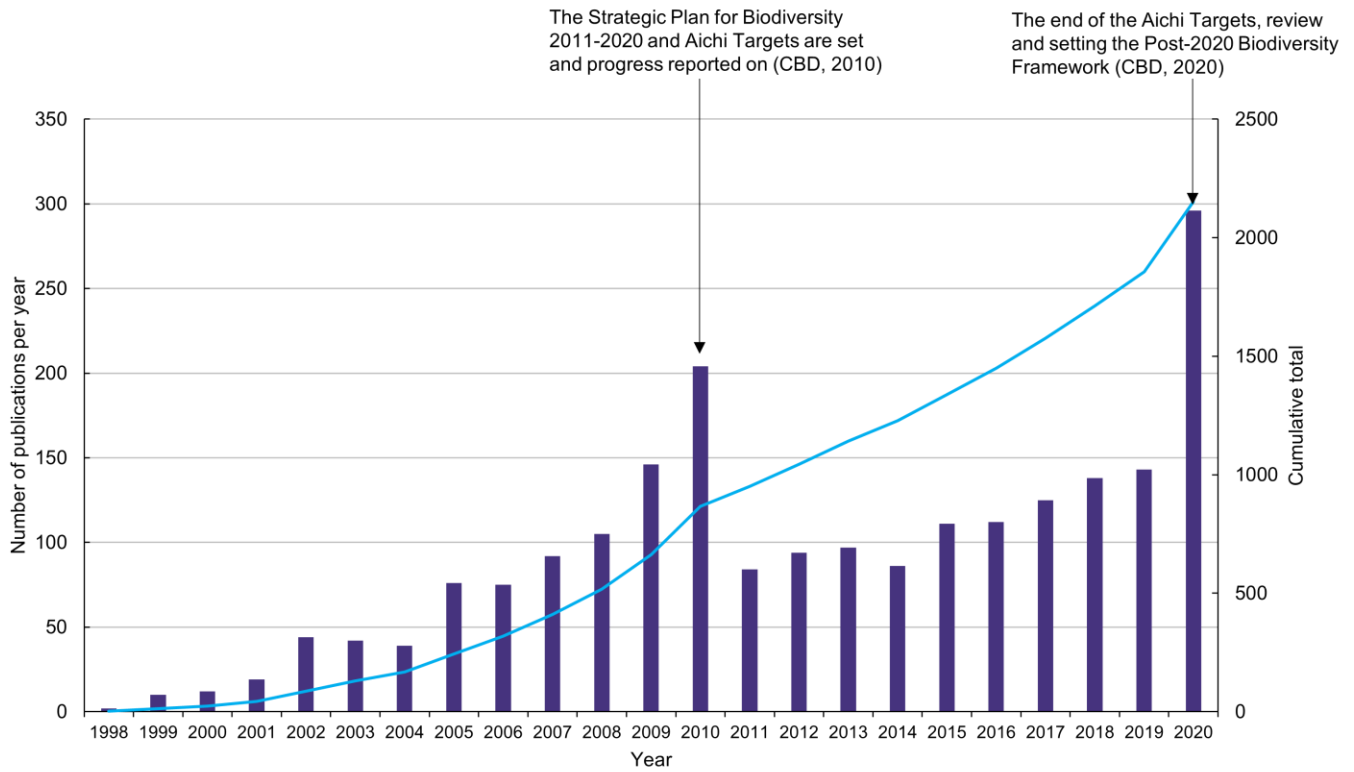

228  
229  
230 **Fig. 1. The number of publications per year citing the Living Planet Index between 1998-2020.** The secondary Y-axis shows  
231 the cumulative total of publications. These 2,152 citations are from academic and grey literature in English and non-English  
232 languages retrieved from Google Scholar using the Publish or Perish software and combined with supplementary and unique  
233 results from Scopus and Web of Science searches for the keywords "Living Planet Index" between the years 1998-2020 (as of 18<sup>th</sup>  
234 of January 2021). See Supplementary Materials A for details on the methods.

## 235 Challenges and opportunities

236 Along with other high-profile biodiversity indicators and reports <sup>122,123</sup>, the underlying data, methods, and  
237 interpretation of the LPI have come repeatedly under scrutiny, which has been a positive catalyst for new  
238 research, collaborations and ameliorations on the scientific rigour of the index. Here we provide an outline  
239 of the challenges faced by the LPI and aim to provide clarity on common misconceptions that have arisen  
240 within recent years.

### 241 1) *The dataset underpinning the LPI*

242 One of the strengths of the LPD is that it is not static: data are continually added and updated to  
243 provide the most complete and accurate picture possible of relative trends in population sizes  
244 (Figure 2). To ensure data are comparable, only species-level time-series which fulfil the following  
245 criteria are added: they are a measure of population abundance (or proxy, such as number of  
246 breeding pairs), with two or more years of data, collected within a specified geographic location  
247 under consistent methods (or explicitly corrected for) <sup>26</sup>. Supplementary metadata (Supplementary  
248 Materials D) are continually updated for both new, and existing time-series, adding a further step in  
249 the data extraction process <sup>26</sup>. The rigorous evaluation of data sources and data extraction not only  
250 limits the amount of applicable data that can be included, but it is also time consuming and labour  
251 intensive, and affects the volume of data that can be processed for each update. Storing these data  
252 in suitable infrastructure and the financial support required to maintain it are a further limitation  
253 common to other biodiversity databases <sup>124</sup>. The costs of running the entire project can be complex  
254 to calculate as the source data is often already published and there are many stakeholders  
255 including researchers and policymakers to consider. A detailed estimate has not been done but the  
256 approximate costs of just maintaining the LPD, alongside basic global and national LPI development  
257 is estimated at £250k per year but this is not always secured annually.

258 Long-term, population, abundance studies at a species population level are a limited resource in  
259 themselves, particularly for highly speciose taxa such as invertebrates and plants which have not



260 been included in the LPD to date (see the future section). Studies which include population data  
261 may not have been designed for long-term population monitoring but to assess population size and  
262 so their methods and survey effort might change with advances in population estimate approaches  
263 (e.g. revised Orangutan estimates in Sabah <sup>125</sup>, which render these data incompatible for inclusion  
264 in the LPD). This issue is amplified for regions and taxa which are recognised as underrepresented  
265 within the dataset such as tropical regions and fish, reptiles and amphibians (see Supplementary  
266 Materials E) <sup>27,126</sup>.

267 Subsequently, the composition of the LPD is likely to reflect bias inherent in species monitoring  
268 schemes which tend to favour certain taxa (e.g. birds), or regions (e.g. high income countries)  
269 <sup>27,127,128</sup>. This is a challenge shared by biodiversity indicators and databases in general <sup>122,129</sup>. In  
270 addition, attempts to source data from grey literature or offline databases is often dependent on the  
271 time and expertise available from researchers and field contacts within chronically neglected and  
272 underfunded areas <sup>130</sup>. To counteract bias in the resulting LPI, two approaches are taken. At the  
273 data inputting stage, a gap analysis of the taxonomic and geographic representation of the LPD is  
274 used to prioritise taxa and regions for targeted data searches (Supplementary Materials E).  
275 However, focussed searches are not always fruitful: within the 2020 LPI, only 4 populations of  
276 African amphibians were included despite targeted efforts <sup>131</sup>. The second step for overcoming bias  
277 in the LPI is in the adoption of the diversity-weighted method (see the LPI methods section).

278 Language is a further constraint to collating representative data for the LPI and can exacerbate  
279 existing geographic biases <sup>132</sup>. The dominance of English-language data sources is partly a  
280 reflection of the LPI project being hosted in an English-speaking country but also of English as a  
281 globally used language for science <sup>133</sup>. However, over a third of biodiversity documents from a  
282 single year were published in languages other than English <sup>134</sup>, so there are likely to be data that  
283 have not been captured because language barriers have not yet been adequately addressed.

284 Collating and storing a continually increasing repository of LPI data, that aligns with FAIR (Findable,  
285 Accessible, Interoperable, and Reusable) Data Principles, requires ongoing investment in the data  
286 infrastructure and management <sup>124,135</sup>. Coupled with this is the importance of promoting data sharing  
287 in a way that alleviates concerns over data ownership and provides appropriate credit to data  
288 providers. Unless a system is in place whereby data providers maintain ownership and control of  
289 their data, there is likely to be a barrier to mobilising data.

290

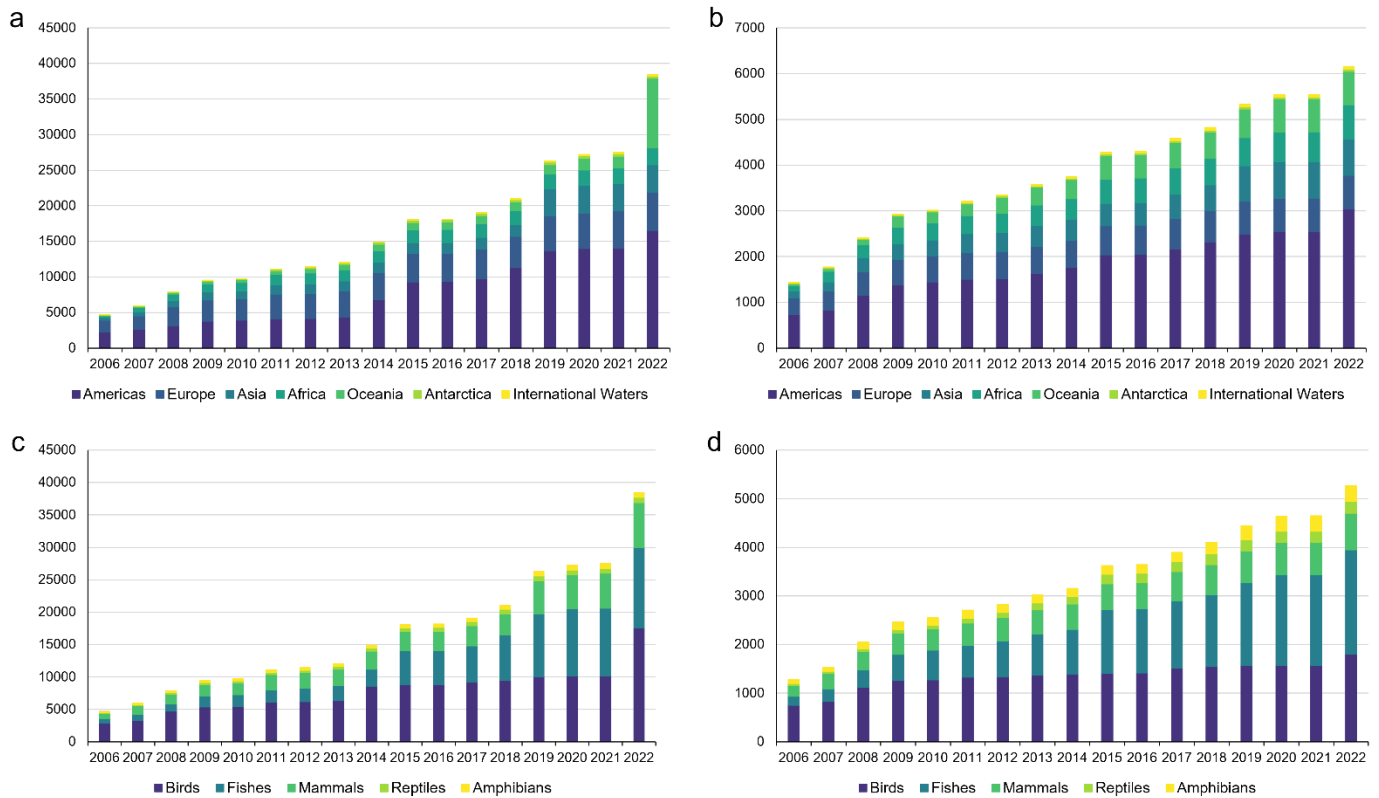

**Figure 2. a-d. Growth in number of populations and species in the Living Planet Database (LPD) by region and taxa.** The cumulative number of new populations (panel a) and species (b) entered by region, and the cumulative number of populations (c) and species (c) entered by taxon. Please note 2b adds up to more than the individual number of species as some species occur in more than one region.

## 2) The LPI methods

The key methodological challenges for the LPI project are to generate a robust LPI indicator of biodiversity and to model the time-series data in the LPD, which vary in length and scale, in a way that allows exploration of underlying patterns in population trends. A further challenge that underpins both issues, is addressing the taxonomic and geographic gaps in the underlying data (Supplementary Materials E).

The basic formula for calculating the LPI has remained consistent: each logged population trend is averaged within a single species and the species trends are aggregated to produce a single index<sup>18</sup>. This aggregation is produced using a geometric mean, an approach used to generate other indices of relative abundance from species abundance data<sup>136-138</sup>. Further levels of aggregation are often used for global, national, and local contexts (see Supplementary Materials F for the global example).

A challenge in the use of a geometric mean of abundance for the calculation of indicators is that it can be sensitive to outliers in the data which may impact the precision of the long-term trend if not addressed<sup>139-141</sup>. While this method is still considered to a more suitable and sensitive metric to assess changes in biodiversity<sup>142,143</sup>, understanding the impact of outliers is important. To tackle this, each new iteration of the global LPI analysis includes sensitivity tests on the influence of single species on the trends and of the effect of short time-series on the LPI, as these are more commonly associated with highly variable or extreme trends<sup>131</sup>. These tests are published in any supplementary information or website for transparency and to demonstrate the robustness of any index<sup>131</sup>.

The modelling of the time-series data in the LPD has been periodically improved. In early iterations of the LPI, the chain method was implemented, which involved linearly interpolating the rate of change between 5-year intervals, (following Loh, et al.<sup>18</sup>). As this approach was sensitive to abrupt changes in population trends, generalised additive modelling (GAM) was adopted to better capture

322 long-term nonlinear trends in populations<sup>26</sup>. National variations of modelling have been tailored to  
323 the type of species monitoring data in the country in question, for example the use of linear  
324 regression for short-term trends in the Canadian Species Index<sup>66,79</sup>.

325 More recently, Bayesian approaches such as state-space models have been applied to model the  
326 population time-series whilst incorporating observation error into the estimation of trends<sup>144</sup>, which  
327 is something that the GAM framework does not account for. This has allowed for new ways of  
328 analysing the LPD, which lend themselves to uncovering the correlates of vertebrate population  
329 trends<sup>145</sup> and the taxonomic and geographic patterns of population trends globally<sup>141</sup>.

330 A significant challenge remains in tackling the underrepresentation in the LPI database of particular  
331 taxa and regions in the LPD so an adaptation to the LPI method was made to mitigate the impacts  
332 of this bias on the index. This diversity-weighted approach was developed and subsequently  
333 adopted for calculating global and regional LPIs<sup>27</sup>. This method places greater weight on species  
334 trends from regions and taxa that are more species-rich but tend to be disproportionately under-  
335 represented in the LPD e.g. the Neotropics. This provides a more representative picture of global  
336 vertebrate trends in lieu of a more complete data set. One drawback is that weight is often placed  
337 on species and regions with the lowest data availability so if the sample of data from a region is not  
338 representative, this could cause an over- or under- estimation of trends. Efforts are also underway  
339 to address gaps in the data set through targeted data collection and to develop models to predict  
340 trends in locations and for taxa which are data deficient, as has been done for extinction risk<sup>146</sup>.

### 342 3) *Communication and interpretation of the LPI*

343 Key attributes of biodiversity indicators are that they should be simplified and easily understood<sup>138</sup>.  
344 The LPI was developed with these criteria in mind and, by aggregating trends from different  
345 ecological realms and geographic regions, it can provide a useful overview and communication tool  
346 for broad audiences. However, the index has been critiqued as oversimplifying the state of  
347 biodiversity<sup>147</sup> and masking important trends<sup>141</sup>. Arguably, there is need for a balance between  
348 providing a simple, clear message about global biodiversity trends whilst supporting it with more in-  
349 depth analysis<sup>123</sup>. To explore this variation, disaggregations of the LPI have been developed (Table  
350 1), for example, for forest specialists<sup>95</sup>.

351 The limited availability of quality, ecological data prior to the 1970s is a common limitation to many  
352 biodiversity indicators<sup>129,148</sup>. The LPI is benchmarked at a temporal baseline of 1970, and this raises  
353 the importance of interpreting the index in context, as geopolitical regions have been impacted by  
354 anthropogenic pressure at different points in time and varying intensity. In Europe, for example, a  
355 significant amount of habitat destruction and overexploitation of some species had occurred prior to  
356 the 1970s and therefore the LPI baseline is set at a significantly depleted reference point<sup>37</sup>. The  
357 year chosen as a baseline can affect the interpretation of the state of biodiversity in a particular  
358 region<sup>149</sup>. Without taking this into consideration, it is possible to underestimate the gravity of the  
359 decline in biodiversity or overestimate a recovery within any given landscape.

360 Communications around biodiversity indicators and biodiversity loss have often centred on species,  
361 and species extinctions respectively, rather than attempting to explain the multi-faceted nature of  
362 biodiversity change and how we measure it<sup>123,150</sup>. Miscommunication and oversimplification of  
363 biodiversity and biodiversity loss, or decline, across the science-society and science-policy  
364 interface, are a challenge shared by biodiversity indicators in general<sup>123</sup>. The impact of substituting  
365 a single word for another in press and media communications, “loss” vs “decline”, has sometimes  
366 led to misinterpretation of the global LPI statistic. A negative trend in the LPI depicts a relative  
367 decline in population sizes, on average, since 1970. The use of the word “loss” in some media  
368 articles can imply that a negative LPI trend is analogous with the disappearance of populations and  
369 even the extinctions of species, which can prove challenging to correct. Media headlines have  
370 referred to large percentages of populations being “wiped out”<sup>151</sup>, which could mislead the public  
371 about the severity of biodiversity decline and, it has been argued, such negative statements about  
372 environmental issues may be counterproductive in trying to stimulate action<sup>152</sup>.

373 Efforts to minimise misinterpretation have been made with each iteration of the LPI, by engaging  
374 with journalists directly through press briefings, providing background information to  
375 communications teams and publicising the supporting information available in technical  
376 supplements to the LPR <sup>131</sup>, websites (<http://stats.livingplanetindex.org/>) and blogs <sup>153</sup>. These efforts  
377 have also reinforced the LPI as a measure of “relative abundance” rather than “abundance” to help  
378 avoid misinterpretations <sup>154</sup>. We have already seen an uptake in the use of the LPR 2020 technical  
379 supplement in recent publications and blogs exploring the LPI <sup>155,156</sup>. The analogy of a FTSE index  
380 for biodiversity is most commonly used to describe the LPI, but a focus in the future should be on  
381 finding other ways to communicate the index that mitigate the use of dramatic narratives but without  
382 compromising while retaining the simple message of the LPI that can be broadly understood.

## 384 The future

385 The LPI project has grown significantly over the last 25 years and provides an important dataset to  
386 communicate the trends in vertebrate populations and investigate the factors that influence them. We  
387 identify four key priorities for the immediate future.

### 388 *1. Increasing representation in the LPI*

389 The composition of the LPI needs to be improved, crucially by increasing the taxonomic and geographic  
390 representation of the data particularly for aquatic species. Incorporating invertebrate and plant species into  
391 the LPI is likely to be challenging given the paucity of monitoring compared to some vertebrate groups <sup>157</sup>  
392 but is key to attaining an indicator of broader biodiversity in addition to and providing a fuller data set for  
393 macro-ecological research. Many national LPIs have already been developed, and maintaining this focus  
394 on increasing the representation of species within countries will provide nations with a tool to track progress  
395 towards future CBD and SDG targets. Indicators also need to be ecologically relevant <sup>138</sup>, so ensuring that  
396 different functional attributes of species within an ecosystem are reflected will be the focus of new research.  
397 These developments in the data set will be realised through the use of emerging techniques to incorporate  
398 unstructured data, such as that collected through citizen science initiatives <sup>158-160</sup>, and capitalising on  
399 growing technology for monitoring biodiversity such as eDNA, satellite monitoring and AI-assisted counting  
400 of species, provided they can be transformed into usable metrics of abundance.

### 401 *2. Streamlining data collation and data access*

402 Sourcing and extracting data continue to be significant bottlenecks for the development of the LPD. Data  
403 searches can be automated to some degree using predictive models based upon titles and abstracts <sup>121</sup>,  
404 but extracting data automatically remains a challenge. Working with publishers, data holders, government  
405 institutions and research funding bodies to automate the process of identifying and extracting data from  
406 articles would be beneficial particularly if a standardised workflow is developed (e.g. Cardoso, et al. <sup>161</sup>),  
407 and systematic review tools may advance data collation in a community-driven way <sup>162</sup>. To address  
408 language barriers, which in turn could help to fill taxonomic and regional data gaps <sup>163</sup>, a protocol for  
409 conducting data searches in multiple languages is under development. This should be part of a broader  
410 strategy to build a sustainable data network for the LPI, which provides accessibility to a global database  
411 (both for data download and upload, e.g. from new national LPI datasets) whilst retaining data quality and  
412 ownership, and assuring appropriate credit to data gatherers and providers. It is also important that the  
413 LPD is made as accessible as possible, both through simple, downloadable, tidy data formats <sup>164</sup> and the  
414 development of Application Programming Interfaces (API) to allow the data to interoperate with other  
415 resources such as the IUCN Red List <sup>112</sup>, Protected Planet <sup>165</sup> and GBIF <sup>111</sup>.

### 416 *3. Better models to link population trends with drivers*

417 The LPI continues to highlight that global biodiversity is in trouble and understanding (and predicting) which  
418 regions and species are likely to decline most in the future is useful. As such, models to better predict  
419 wildlife abundance trends for species and regions where we have poorer data is critical. Understanding the  
420 quality and utility of these models will allow us to make concrete and valuable predictions. The varied  
421 response of some populations to their changing environment highlights an important question – are some  
422 populations useful ‘canaries’ of pending ecosystem collapse and how might we best identify them?

423 Models that combine LPI data with drivers such as land-use and climate-change data have demonstrated  
424 that both are important drivers of population trends <sup>118</sup>. Developing these models further allows us to make  
425 predictions about how biodiversity might change under future scenarios and management interventions <sup>9</sup>,  
426 highlighting one evolving use of biodiversity datasets like the LPD.

427 Whilst incorporating data on drivers from other global data sets can inform explanatory analysis for species  
428 trend data <sup>118</sup>, population-scale information can also provide a powerful set of variables, for example in  
429 understanding the effect of different direct drivers <sup>101</sup> or to pave the way for counterfactual analysis of  
430 different management types (e.g. Jellesmark, et al. <sup>166</sup>). However, the current coding for threats and  
431 conservation action in the LPD lacks alignment with established frameworks <sup>167</sup>, so transferring the ancillary  
432 information into these classification schemes and maintaining the recording of population drivers will  
433 improve the utility of models and ground-truthing of broad scale data sets in the future.

#### 434 *4. Increasing the utility of the LPI for policy*

435 From a policy perspective, an emphasis on developing LPIs at the national level is needed to expand its  
436 use as a communication and reporting tool. With reporting requirements at a national level for the SDGs  
437 and the CBD, national LPIs would serve a dual purpose of providing countries with a sensitive indicator for  
438 reporting while boosting data representation for the global index. Disaggregations of the LPI on themes  
439 such as use, trade, migration and wetlands should continue to be developed, so that these are available for  
440 reporting against other multilateral environmental agreements such as the Ramsar Convention on  
441 Wetlands, CITES and the CMS.

442 The LPI performed well in an evaluation of biodiversity indicators using decision science <sup>17</sup>, although gaps  
443 were identified in the practice of regular tests of the index and in assessing the cost- effectiveness of the  
444 LPI relative to other indicators. Creating a better understanding of how the LPI fits within the growing suite  
445 of biodiversity indicators such as the Red List Index <sup>168</sup> and the Biodiversity Intactness Index <sup>169</sup>, and clearly  
446 presenting the complementarity of these indicators with each other, will be key to developing a clear and  
447 consistent narrative of global biodiversity change <sup>14</sup> and to ensure the suitability of the LPI within any multi-  
448 dimensional indicator framework <sup>170,171</sup>.

## 449 **Conclusion**

450 The LPI has evolved from a simple communications tool to a large and growing database, policy tool and  
451 foundation for research. The open-access dataset and method are globally important resources for the  
452 scientific community and beyond, but improvements are still needed to enhance the representation of  
453 biodiversity in the underlying data and produce clear and meaningful outputs. Collaboration and  
454 engagement within the fields of science, policy, conservation and communication — some of which have  
455 fuelled much of the development to date, will continue to be important for ensuring the LPI project remains  
456 fit for purpose.

## 458 **Acknowledgements**

459 This research was partly funded by Research England, SL was funded by WWF-NL; LM, SD, VM were  
460 funded by WWF-UK.

461 We acknowledge the following individuals who were instrumental in the initial development and funding of  
462 the LPI project; Georgina Mace, Ben Collen, Jonathan Baillie, and Raj Amin. We also thank the LPI  
463 volunteers, collaborators, and contributors to the LPD past, and present for their essential support to the  
464 LPI project.

## 466 **Supporting information**

467 Supplementary information is available for this paper at: DOI XXX



468 These include the methods for the citation search in academic and grey literature, and metadata coding  
469 (Supplementary materials A), the results of citation search and metadata coding (Supplementary materials  
470 B), the results of the Altmetric data analysis for key LPI papers (Supplementary materials C), an infographic  
471 of the underlying data within the LPD and summary of the growth in populations and species in the LPD  
472 over time (Supplementary materials D), a summary of LPD data diagnostics for underrepresented taxa and  
473 realms (Supplementary materials E) and a visualisation of the global aggregation LPI method  
474 (Supplementary materials F).

## 475 References

- 476 1 WWF/ZSL. *The Living Planet Index Database (LPD)*, <[www.livingplanetindex.org](http://www.livingplanetindex.org)> (2020).
- 477 2 Loh, J. *et al.* Living planet report: 1998. (WWF, Gland, Switzerland, 1998).
- 478 3 UN. Convention on biological diversity. 5th June 1992. (United Nations Conference on Environment  
479 and Development, Rio de Janeiro, 1992).
- 480 4 Tittensor, D. P. *et al.* A mid-term analysis of progress toward international biodiversity targets.  
481 *Science* **346**, 241-244, doi:10.1126/science.1257484 (2014).
- 482 5 WWF. Living planet report 2020 - Bending the curve of biodiversity loss. (WWF, Gland, Switzerland,  
483 2020).
- 484 6 Diaz, S. *et al.* Assessing nature's contributions to people. *Science* **359**, 270-272,  
485 doi:10.1126/science.aap8826 (2018).
- 486 7 IPBES. Global assessment report on biodiversity and ecosystem services of the Intergovernmental  
487 Science-Policy Platform on Biodiversity and Ecosystem Services. (IPBES Secretariat, Bonn,  
488 Germany, 2019).
- 489 8 Diaz, S. *et al.* Pervasive human-driven decline of life on Earth points to the need for transformative  
490 change. *Science* **366**, doi:10.1126/science.aax3100 (2019).
- 491 9 Leclère, D. *et al.* Bending the curve of terrestrial biodiversity needs an integrated strategy. *Nature*  
492 **585**, 551-556, doi:10.1038/s41586-020-2705-y (2020).
- 493 10 Mace, G. M. *et al.* Aiming higher to bend the curve of biodiversity loss. *Nature Sustainability* **1**, 448-  
494 451, doi:10.1038/s41893-018-0130-0 (2018).
- 495 11 Xu, H. *et al.* Ensuring effective implementation of the post-2020 global biodiversity targets. *Nat Ecol*  
496 *Evol* **5**, 411-418, doi:10.1038/s41559-020-01375-y (2021).
- 497 12 UNEP (United Nations Environment Programme). Decision X/2: The strategic plan for biodiversity  
498 2011–2020 and the Aichi Biodiversity Targets. Adopted at the 10th Conference Of The Parties  
499 (COP) to the Convention On Biological Diversity (CBD). (UNEP, Montreal, Canada, 2010).
- 500 13 UN. Transforming our world: The 2030 agenda for sustainable development. (United Nations (UN),  
501 2015).
- 502 14 Hill, S. L. L. *et al.* Reconciling Biodiversity Indicators to Guide Understanding and Action.  
503 *Conservation Letters* **9**, 405-412, doi:10.1111/conl.12291 (2016).
- 504 15 Jones, J. P. *et al.* The why, what, and how of global biodiversity indicators beyond the 2010 target.  
505 *Conserv Biol* **25**, 450-457, doi:10.1111/j.1523-1739.2010.01605.x (2011).
- 506 16 Nicholson, E. *et al.* Making robust policy decisions using global biodiversity indicators. *PLoS ONE* **7**,  
507 e41128, doi:10.1371/journal.pone.0041128 (2012).
- 508 17 Watermeyer, K. E. *et al.* Using decision science to evaluate global biodiversity indices. *Conserv Biol*  
509 **35**, 492-501, doi:10.1111/cobi.13574 (2021).

- 510 18 Loh, J. *et al.* The Living Planet Index: Using species population time series to track trends in  
511 biodiversity. *Philosophical Transactions of the Royal Society B: Biological Sciences* **360**, 289-295,  
512 doi:10.1098/rstb.2004.1584 (2005).
- 513 19 Butchart, S. H. *et al.* Global biodiversity: Indicators of recent declines. *Science* **328**, 1164-1168,  
514 doi:10.1126/science.1187512 (2010).
- 515 20 Arinaitwe, H., Pomeroy, D. E. & Tushabe, H. The State of Uganda's Biodiversity: 2000. 56 (National  
516 Biodiversity Data Bank, Makerere University Institute of Environment and Natural Resources,  
517 Kampala, Uganda, 2000).
- 518 21 Pomeroy, D. & Tushabe, H. The State of Uganda's Biodiversity 2004. (National Biodiversity  
519 DataBank (NBDB). Makerere University Institute of Environment and Natural Resources (MUIENR),  
520 Kampala, Uganda, 2004).
- 521 22 Jenkins, M., Kapos, V. & Loh, J. Rising to the biodiversity challenge. The role of species population  
522 trend indices like the Living Planet Index in tracking progress towards global and national  
523 biodiversity targets. (World Bank, Washington, DC. USA, 2004).
- 524 23 Balmford, A., Crane, P. R., Green, R. E. & Mace, G. M. Discussion Meeting Issue 'Beyond  
525 extinction rates: monitoring wild nature for the 2010 target'. *Philosophical Transactions of the Royal  
526 Society B: Biological Sciences* **360**, 219-477 (2005).
- 527 24 UNEP (United Nations Environment Programme). Decision VIII/15: Framework for monitoring  
528 implementation of the achievement of the 2010 target and integration of targets into the thematic  
529 programmes of work. Adopted at the 8th Conference Of The Parties (COP) to the Convention On  
530 Biological Diversity (CBD). (UNEP, Curitiba, Brazil, 2006).
- 531 25 UNEP (United Nations Environment Programme). Report on the eighth meeting of the Conference  
532 of the Parties to the Convention on Biological Diversity, CBD. (UNEP, Nairobi, 2006).
- 533 26 Collen, B. *et al.* Monitoring change in vertebrate abundance: The Living Planet Index. *Conservation  
534 Biology* **23**, 317-327, doi:10.1111/j.1523-1739.2008.01117.x (2009).
- 535 27 McRae, L., Deinet, S. & Freeman, R. The diversity-weighted Living Planet Index: Controlling for  
536 taxonomic bias in a global biodiversity indicator. *PLOS ONE* **12**, e0169156,  
537 doi:10.1371/journal.pone.0169156 (2017).
- 538 28 WWF. Living Planet Report 2020 - Network results. (WWF, Internal report, 2021).
- 539 29 WWF. Living planet Report 2020. Bending the curve of biodiversity loss: a deep dive into climate  
540 and biodiversity. (WWF, Gland, Switzerland, 2020).
- 541 30 WWF. Living planet Report 2020. Bending the curve of biodiversity loss: a deep dive into  
542 freshwater. (WWF, Gland, Switzerland, 2020).
- 543 31 WWF. Living Planet Report 2020 youth edition: A guide for our future. (WWF, Gland, Switzerland,  
544 2020).
- 545 32 Jones, J. P. G., Thomas-Walters, L., Rust, N. A., Veríssimo, D. & Januchowski-Hartley, S. Nature  
546 documentaries and saving nature: Reflections on the new Netflix series Our Planet. *People and  
547 Nature* **1**, 420-425, doi:10.1002/pan3.10052 (2019).
- 548 33 WWF/tve. Our Planet: Our impact - The first year of the Our Planet Project. (WWF-UK, Woking, UK,  
549 2020).
- 550 34 WWF. Rapport Planète Vivante - La Nature en Belgique. (WWF, Brussels, Belgium, 2020).
- 551 35 Wereld Natuur Fonds. Living Planet Report Nederland. Natuur en landbouw verbonden. (WWF-NL,  
552 Zeist, 2020).

- 553 36 WWF-Canada. Living Planet Report Canada: Wildlife At Risk. (World Wildlife Fund Canada,  
554 Toronto, Canada, 2020).
- 555 37 Deinet, S. *et al.* Wildlife comeback in Europe: The recovery of selected mammal and bird species.  
556 Final report to Rewilding Europe by ZSL, BirdLife International and the European Bird Census  
557 Council. (ZSL, London, UK, 2013).
- 558 38 Rewilding Europe. Annual review 2013. (Rewilding Europe, The Netherlands, 2013).
- 559 39 UNEP (United Nations Environment Programme). in *24th Meeting of the Subsidiary Body On*  
560 *Scientific, Technical And Technological Advice (SBSTTA)* (Convention on Biological Diversity  
561 (CBD)), 2020).
- 562 40 Jellesmark, S. *et al.* Assessing the global impact of targeted conservation actions on species  
563 abundance. *bioRxiv*, 2022.2001.2014.476374, doi:10.1101/2022.01.14.476374 (2022).
- 564 41 Millennium Ecosystem Assessment. Ecosystems and Human Well-being: Biodiversity Synthesis.  
565 (World Resources Institute, Washington, DC., 2005).
- 566 42 IPBES. The IPBES regional assessment report on biodiversity and ecosystem services for the  
567 Americas of the Intergovernmental Science-Policy Platform on Biodiversity and Ecosystem  
568 Services. (Intergovernmental Science-Policy Platform on Biodiversity and Ecosystem Services.  
569 IPBES Secretariat, Bonn, Germany, 2018).
- 570 43 IPBES. The IPBES regional assessment report on biodiversity and ecosystem services for Europe  
571 and Central Asia of the Intergovernmental Science-Policy Platform on Biodiversity and Ecosystem  
572 Services. (Intergovernmental Science-Policy Platform on Biodiversity and Ecosystem Services.  
573 IPBES Secretariat, Bonn, Germany, 2018).
- 574 44 IPBES. The IPBES regional assessment report on biodiversity and ecosystem services for Africa of  
575 the Intergovernmental Science-Policy Platform on Biodiversity and Ecosystem Services.  
576 (Intergovernmental Science-Policy Platform on Biodiversity and Ecosystem Services. IPBES  
577 Secretariat, Bonn, Germany, 2018).
- 578 45 IPBES. The IPBES regional assessment report on biodiversity and ecosystem services for Asia and  
579 the Pacific of the Intergovernmental Science-Policy Platform on Biodiversity and Ecosystem  
580 Services. (Intergovernmental Science-Policy Platform on Biodiversity and Ecosystem Services.  
581 IPBES Secretariat, Bonn, Germany, 2018).
- 582 46 UNEP (United Nations Environment Programme). Global Environment Outlook 3: Past, present and  
583 future perspectives. (United Nations Environment Programme, Nairobi, Kenya, 2002).
- 584 47 UNEP (United Nations Environment Programme). Global Environment Outlook 4: Environment for  
585 development. (United Nations Environment Programme, Nairobi, Kenya, 2007).
- 586 48 UNEP (United Nations Environment Programme). Global Environment Outlook 5: Environment for  
587 the future we want. (United Nations Environment Programme, Nairobi, Kenya, 2012).
- 588 49 UNEP (United Nations Environment Programme). *Global Environment Outlook – GEO-6: Healthy*  
589 *planet, healthy people*. (United Nations Environment Programme. Cambridge University Press,  
590 2019).
- 591 50 Secretariat of the Convention on Biological Diversity. Global Biodiversity Outlook 2. 81 + vii  
592 (Montréal, Canada, 2006).
- 593 51 Secretariat of the Convention on Biological Diversity. Global Biodiversity Outlook 3. 94 (Montréal,  
594 Canada, 2010).
- 595 52 Secretariat of the Convention on Biological Diversity. Global Biodiversity Outlook 4. 155 (Montréal,  
596 Canada, 2014).

- 597 53 Secretariat of the Convention on Biological Diversity. Global Biodiversity Outlook 5. (Montréal,  
598 Canada, 2020).
- 599 54 Ramsar Convention on Wetlands. Global wetland outlook: State of the world's wetlands and their  
600 services to people. (Ramsar Convention Secretariat, Gland, Switzerland, 2018).
- 601 55 MWO (Mediterranean Wetlands Observatory). Mediterranean Wetlands Outlook. First  
602 Mediterranean Wetlands Observatory report - Technical report. 128 pages (Tour du Valat, France,  
603 2012).
- 604 56 MWO (Mediterranean Wetlands Observatory). Mediterranean Wetlands Outlook 2: Solutions for  
605 Sustainable Mediterranean Wetlands. (Tour du Valat, France, 2018).
- 606 57 Deinet, S. The Living Planet Index (LPI) for species listed on the CMS Appendices. Technical  
607 summary submitted to UNEP-WCMC and the CMS Secretariat. 11 (ZSL,  
608 UNEP/CMS/COP13/Doc.24/Annex 5, 2019).
- 609 58 Latham, J., Collen, B., McRae, L. & Loh, J. The Living Planet Index for migratory species: An index  
610 of change in population abundance. 22 (ZSL/WWF, 2008).
- 611 59 CAFF (Conservation of Arctic Flora and Fauna). *Arctic biodiversity assessment. Status and trends  
612 in Arctic biodiversity*. (Conservation of Arctic Flora and Fauna, 2013).
- 613 60 Dasgupta, P. The economics of biodiversity: The Dasgupta review. (HM Treasury, London, 2021).
- 614 61 UK Parliament. *Early Day Motions. Number 624: Global biodiversity. Tabled 31st October, 2016  
615 (2016-17 Session)* (2016).
- 616 62 McRae, L. *et al.* Living Planet Index Guidance for national and regional use Version 1.1. 11  
617 (Cambridge, UK., 2008).
- 618 63 Brooks, T. M. *et al.* Analysing biodiversity and conservation knowledge products to support regional  
619 environmental assessments. *Scientific Data* **3**, 160007, doi:10.1038/sdata.2016.7 (2016).
- 620 64 PACA (Observatoire Régional de la Biodiversité en Provence-Alpes-Côte d'Azur). Indice Région  
621 Vivante. Comment évolue la biodiversité en Provence-Alpes-Côte d'Azur? , (Observatoire Régional  
622 de la Biodiversité en Provence-Alpes-Côte d'Azur, 2018).
- 623 65 Bayraktarov, E. *et al.* A threatened species index for Australian birds. *Conservation Science and  
624 Practice* **3**, doi:10.1111/csp2.322 (2020).
- 625 66 Marconi, V. *et al.* Population declines among Canadian vertebrates: But data of different quality  
626 show diverging trends. *Ecological Indicators* **130**, 108022, doi:10.1016/j.ecolind.2021.108022  
627 (2021).
- 628 67 Environment and Climate Change Canada (ECCC). Canadian Environmental Sustainability  
629 Indicators: Canadian species index. (2019).
- 630 68 Freeman, R., McRae, L., Deinet, S., Amin, R. & Collen, B. *rpi: Tools for calculating indices using  
631 the Living Planet Index method. R Package*, <<https://github.com/Zoological-Society-of-London/rpi>>  
632 (2017).
- 633 69 ICMBio-CENAP/Programa-Monitora-Florestal-Global. *Análise de dados Mastroaves do protocolo  
634 florestal global do programa Monitora*, <[https://github.com/ICMBio-CENAP/Programa-Monitora-  
635 Florestal-Global](https://github.com/ICMBio-CENAP/Programa-Monitora-Florestal-Global)> (2021).
- 636 70 Brotons, L. *et al.* Estat de la Natura a Catalunya 2020. (Departament de Territori i Sostenibilitat.  
637 Generalitat de Catalunya, Barcelona, 2020).



- 638 71 Maas, S. & Giroud, I. Indice Région Vivante (IRV) : indicateurs oiseaux de Franche-Comté. 11p  
639 (LPO Franche-Comté, DREAL Bourgogne Franche-Comté et Conseil Régional Bourgogne Franche-  
640 Comté, 2016).
- 641 72 Pomeroy, D., Tushabe, H. & Loh, J. The State of Uganda's Biodiversity 2017. (National Biodiversity  
642 Data Bank. Makerere University, Kampala, 2017).
- 643 73 Pomeroy, D. & Tushabe, H. The State of Uganda's Biodiversity 2006. (Makerere Institute of  
644 Environment and Natural Resources/National Biodiversity Data Bank, 2006).
- 645 74 NEMA (National Environment Management Authority). State of Environment Report for Uganda.  
646 332 (NEMA, Kampala, Uganda, 2006/7).
- 647 75 Pomeroy, D. & Tushabe, H. The state of Uganda's biodiversity report: Sixth biennial report.  
648 (National Biodiversity Data Bank (NBDB), Makerere University Institute of Environment and Natural  
649 Resources (MUIENR), 2008).
- 650 76 WWF-Norge. Naturindeks for Norge 2005. Utfor bakke med norsk natur. (WW-Norge, Oslo, Norway,  
651 2005).
- 652 77 Muller, H. *et al.* The Canadian Species Index. (ZSL/Environment Canada, 2016).
- 653 78 CBS, PBL, RIVM & WUR. *Trend fauna - all species monitored - Living Planet Index Netherlands,*  
654 *1990-2018 (indicator 1569, version 05, 30 March 2020),* <[https://www.clo.nl/en/indicators/en1569-](https://www.clo.nl/en/indicators/en1569-living-planet-index-for-the-netherlands)  
655 [living-planet-index-for-the-netherlands](https://www.clo.nl/en/indicators/en1569-living-planet-index-for-the-netherlands)> (2021).
- 656 79 van Strien, A. J. *et al.* Modest recovery of biodiversity in a western European country: The Living  
657 Planet Index for the Netherlands. *Biological Conservation* **200**, 44-50,  
658 doi:10.1016/j.biocon.2016.05.031 (2016).
- 659 80 WWF China. Living planet report China 2015: Development, species and ecological civilization.  
660 (WWF China in partnership with China Council for International Cooperation on Environment and  
661 Development (CCICED), Institute of Geographic Sciences and Natural Resources Research  
662 (IGSNRR) and Institute of Zoology of Chinese Academy of Sciences (CAS), and the Global  
663 Footprint Network, 2015).
- 664 81 The Government of China. Sixth national report to the Conventional on Biological Diversity.  
665 (Secretariat of the Convention on Biological Diversity (SCBD), The Clearing-House Mechanism of  
666 the Convention on Biological Diversity (CHM), 2019).
- 667 82 Semmelmayr, K. & Hackländer, K. Monitoring vertebrate abundance in Austria: Developments over  
668 30 years. *Die Bodenkultur: Journal of Land Management, Food and Environment* **71**, 19-30,  
669 doi:10.2478/boku-2020-0003 (2020).
- 670 83 McRae, L., Böhm, M., Deinet, S., Gill, M. & Collen, B. The Arctic Species Trend Index: using  
671 vertebrate population trends to monitor the health of a rapidly changing ecosystem. *Biodiversity* **13**,  
672 144-156, doi:10.1080/14888386.2012.705085 (2012).
- 673 84 McRae, L. *et al.* Arctic Species Trend Index 2010. Tracking Trends in Arctic Wildlife. (CAFF  
674 International Secretariat, 2010).
- 675 85 McRae, L., Deinet, S., Gill, M. & Collen, B. The Arctic Species Trend Index: Tracking trends in Arctic  
676 marine populations. (Conservation of Arctic Flora and Fauna (CAFF), Iceland, 2012).
- 677 86 Deinet, S. *et al.* Arctic Species Trend Index: Migratory Birds Index. (Conservation of Arctic Flora and  
678 Fauna (CAFF), Akureyri, Iceland, 2015).
- 679 87 Galewski, T., Segura, L., Biquet, J., Saccon, E. & Boutry, N. Living Mediterranean Report:  
680 Monitoring species trends to secure one of the major biodiversity hotspots. (Tour du Valat (TdV),  
681 France, 2021).



- 682 88 EEA (European Environment Agency). Marine messages II: Navigating the course towards clean,  
683 healthy and productive seas through implementation of an ecosystem-based approach. (European  
684 Environment Agency, Luxembourg, 2019).
- 685 89 Deinet, S. *et al.* The Living Planet Index for Global Estuarine Systems: Technical report. (WWF/ZSL,  
686 2010).
- 687 90 Hardesty-Moore, M. *et al.* Migration in the Anthropocene: how collective navigation, environmental  
688 system and taxonomy shape the vulnerability of migratory species. *Philos Trans R Soc Lond B Biol*  
689 *Sci* **373**, doi:10.1098/rstb.2017.0017 (2018).
- 690 91 WWF. Living planet report 2016. Risk and resilience in a new era. Report No. 978-2-940529-40-7,  
691 (WWF, Gland, Switzerland, 2016).
- 692 92 Saha, A. *et al.* Tracking Global Population Trends: Population Time-Series Data and a Living Planet  
693 Index for Reptiles. *Journal of Herpetology* **52**, doi:10.1670/17-076 (2018).
- 694 93 He, F. *et al.* The global decline of freshwater megafauna. *Glob Chang Biol* **25**, 3883-3892,  
695 doi:10.1111/gcb.14753 (2019).
- 696 94 Deinet, S. *et al.* The Living Planet Index (LPI) for migratory freshwater fish - Technical Report.  
697 (World Fish Migration Foundation, The Netherlands, 2020).
- 698 95 Green, E. J. *et al.* Below the canopy: global trends in forest vertebrate populations and their drivers.  
699 *Proc Biol Sci* **287**, 20200533, doi:10.1098/rspb.2020.0533 (2020).
- 700 96 Geldmann, J. *et al.* A global analysis of management capacity and ecological outcomes in terrestrial  
701 protected areas. *Conservation Letters* **11**, e12434, doi:10.1111/conl.12434 (2018).
- 702 97 Craigie, I. D. *et al.* Large mammal population declines in Africa's protected areas. *Biological*  
703 *Conservation* **143**, 2221-2228, doi:10.1016/j.biocon.2010.06.007 (2010).
- 704 98 Barnes, M. D. *et al.* Wildlife population trends in protected areas predicted by national socio-  
705 economic metrics and body size. *Nature Communications* **7**, 12747, doi:10.1038/ncomms12747  
706 (2016).
- 707 99 Costelloe, B. *et al.* Global biodiversity indicators reflect the modeled impacts of protected area policy  
708 change: Biodiversity indicators and protected areas. *Conservation Letters* **9**, 14-20,  
709 doi:10.1111/conl.12163 (2016).
- 710 100 Currie, J., Marconi, V. & Kerr, J. An analysis of threats and factors that predict trends in Canadian  
711 vertebrates designated as at-risk. *Facets* **5**, 49-66, doi:10.1139/facets-2019-0017 (2020).
- 712 101 McRae, L. *et al.* A global indicator of utilised wildlife populations: regional trends and the impact of  
713 management. *bioRxiv*, doi:10.1101/2020.11.02.365031 (2021).
- 714 102 Tierney, M. *et al.* Use it or lose it: Measuring trends in wild species subject to substantial use. *Oryx*  
715 **48**, 420-429, doi:10.1017/S0030605313000653 (2014).
- 716 103 Pacoureau, N. *et al.* Half a century of global decline in oceanic sharks and rays. *Nature* **589**, 567-  
717 571, doi:10.1038/s41586-020-03173-9 (2021).
- 718 104 Harmon, D. & Loh, J. The index of linguistic diversity: A new quantitative measure of trends in the  
719 status of the world's languages. *Language Documentation & Conservation* **4**, 97-151,  
720 doi:<http://hdl.handle.net/10125/4474> (2010).
- 721 105 Loh, J. & Harmon, D. Biocultural Diversity: threatened species, endangered languages. (WWF  
722 Netherlands, Zeist, The Netherlands, 2014).

- 723 106 Dixon, M. J. R. *et al.* Tracking global change in ecosystem area: The Wetland Extent Trends index.  
724 *Biological Conservation* **193**, 27-35, doi:10.1016/j.biocon.2015.10.023 (2016).
- 725 107 Darrah, S. E. *et al.* Improvements to the Wetland Extent Trends (WET) index as a tool for  
726 monitoring natural and human-made wetlands. *Ecological Indicators* **99**, 294-298,  
727 doi:10.1016/j.ecolind.2018.12.032 (2019).
- 728 108 Oppenheimer, P. *et al.* The SPOTT index: A proof-of-concept measure for tracking public disclosure  
729 in the palm oil industry. *Current Research in Environmental Sustainability* **3**,  
730 doi:10.1016/j.crsust.2021.100042 (2021).
- 731 109 Millard, J. W., Gregory, R. D., Jones, K. & Freeman, R. The Species Awareness Index (SAI): a  
732 Wikipedia-derived conservation culturomics metric for public biodiversity awareness. *bioRxiv*,  
733 doi:10.1101/2020.08.17.254177 (2020).
- 734 110 UNEP-WCMC (UN Environment Programme World Conservation Monitoring Centre). *The*  
735 *Biodiversity Indicators Partnership (BIP)* <<https://www.bipindicators.net/>> (2021).
- 736 111 GBIF. *GBIF: The Global Biodiversity Information Facility*, <<https://www.gbif.org/>> (2021).
- 737 112 IUCN. *The IUCN Red List of Threatened Species. Version 2021-3.*, <<https://www.iucnredlist.org/>>  
738 (2021).
- 739 113 Hudson, L. N. *et al.* The database of the PREDICTS (Projecting Responses of Ecological Diversity  
740 In Changing Terrestrial Systems) project. *Ecology and Evolution* **7**, 145-188, doi:10.1002/ece3.2579  
741 (2017).
- 742 114 Dornelas, M. *et al.* BioTIME: A database of biodiversity time series for the Anthropocene. *Glob Ecol*  
743 *Biogeogr* **27**, 760-786, doi:10.1111/geb.12729 (2018).
- 744 115 Collen, B. *et al.* Predicting how populations decline to extinction. *Philosophical Transactions of the*  
745 *Royal Society B: Biological Sciences* **366**, 2577-2586, doi:10.1098/rstb.2011.0015 (2011).
- 746 116 Di Fonzo, M. D., Collen, B. & Mace, G. M. A new method for identifying rapid decline dynamics in  
747 wild vertebrate populations. *Ecol Evol* **3**, 2378-2391, doi:10.1002/ece3.596 (2013).
- 748 117 Noviello, N., McRae, L., Freeman, R. & Clements, C. Body mass and latitude predict the presence  
749 of multiple stressors in global vertebrate populations. doi:10.1101/2020.12.17.423192 (2020).
- 750 118 Spooner, F. E. B., Pearson, R. G. & Freeman, R. Rapid warming is associated with population  
751 decline among terrestrial birds and mammals globally. *Glob Chang Biol* **24**, 4521-4531,  
752 doi:10.1111/gcb.14361 (2018).
- 753 119 Ament, J. M. *et al.* Compatibility between agendas for improving human development and wildlife  
754 conservation outside protected areas: Insights from 20 years of data. *People and Nature* **1**, 305-  
755 316, doi:10.1002/pan3.10041 (2019).
- 756 120 University of Edinburgh. *Our Coding Club*, <<https://ourcodingclub.github.io/>> (2021).
- 757 121 Cornford, R. *et al.* Fast, scalable, and automated identification of articles for biodiversity and  
758 macroecological datasets. *Global Ecology and Biogeography* **30**, 339-347, doi:10.1111/geb.13219  
759 (2020).
- 760 122 Rodrigues, A. S., Pilgrim, J. D., Lamoreux, J. F., Hoffmann, M. & Brooks, T. M. The value of the  
761 IUCN Red List for conservation. *Trends Ecol Evol* **21**, 71-76, doi:10.1016/j.tree.2005.10.010 (2006).
- 762 123 Turnhout, E. & Purvis, A. Biodiversity and species extinction: categorisation, calculation, and  
763 communication. *Griffith Law Review* **29**, 669-685, doi:10.1080/10383441.2020.1925204 (2021).

- 764 124 Kays, R., McShea, W. J., Wikelski, M. & Zurell, D. Born-digital biodiversity data: Millions and billions. *Diversity and Distributions* **26**, 644-648, doi:10.1111/ddi.12993 (2020).  
765
- 766 125 Ancrenaz, M. *et al.* Aerial surveys give new estimates for orangutans in Sabah, Malaysia. *PLoS Biol*  
767 **3**, e3, doi:10.1371/journal.pbio.0030003 (2005).
- 768 126 Collen, B., Ram, M., Zamin, T. & McRae, L. The tropical biodiversity data gap: Addressing disparity  
769 in global monitoring. *Tropical Conservation Science* **1**, 75-88, doi:10.1177/194008290800100202  
770 (2008).
- 771 127 Moussy, C. *et al.* A quantitative global review of species population monitoring. *Conserv Biol*,  
772 doi:10.1111/cobi.13721 (2021).
- 773 128 Proença, V. *et al.* Global biodiversity monitoring: From data sources to Essential Biodiversity  
774 Variables. *Biological Conservation* **213**, 256-263, doi:10.1016/j.biocon.2016.07.014 (2017).
- 775 129 Hoffmann, M., Brooks, T. M., Butchart, S. H. M., Gregory, R. D. & McRae, L. in *Encyclopedia of the*  
776 *Anthropocene* 175-184 (2018).
- 777 130 Stephenson, P. J. *et al.* Priorities for big biodiversity data. *Frontiers in Ecology and the Environment*  
778 **15**, 124-125, doi:10.1002/fee.1473 (2017).
- 779 131 WWF. Living planet Report 2020. Bending the curve of biodiversity loss: a deep dive into the Living  
780 Planet Index. Marconi, V., McRae, L., Deinet, S., Ledger, S. and Freeman, F. in (WWF, Gland,  
781 Switzerland, 2020).
- 782 132 Amano, T. & Sutherland, W. J. Four barriers to the global understanding of biodiversity  
783 conservation: wealth, language, geographical location and security. *Proc Biol Sci* **280**, 20122649,  
784 doi:10.1098/rspb.2012.2649 (2013).
- 785 133 Montgomery, S. L. *Does science need a global language?*, (The University of Chicago Press,  
786 2013).
- 787 134 Amano, T., Gonzalez-Varo, J. P. & Sutherland, W. J. Languages Are Still a Major Barrier to Global  
788 Science. *PLoS Biol* **14**, e2000933, doi:10.1371/journal.pbio.2000933 (2016).
- 789 135 Wilkinson, M. D. *et al.* The FAIR Guiding Principles for scientific data management and stewardship.  
790 *Sci Data* **3**, 160018, doi:10.1038/sdata.2016.18 (2016).
- 791 136 Buckland, S. T., Magurran, A. E., Green, R. E. & Fewster, R. M. Monitoring change in biodiversity  
792 through composite indices. *Philosophical Transactions of the Royal Society B: Biological Sciences*  
793 **360**, 243-254, doi:10.1098/rstb.2004.1589 (2005).
- 794 137 Buckland, S. T., Marsden, S. J. & Green, R. E. Estimating bird abundance: making methods work.  
795 *Bird Conservation International* **18**, S91-S108, doi:10.1017/s0959270908000294 (2008).
- 796 138 Gregory, R. D. *et al.* Developing indicators for European birds. *Philos Trans R Soc Lond B Biol Sci*  
797 **360**, 269-288, doi:10.1098/rstb.2004.1602 (2005).
- 798 139 Buckland, S. T., Studeny, A. C., Magurran, A. E., Illian, J. B. & Newson, S. E. The geometric mean  
799 of relative abundance indices: a biodiversity measure with a difference. *Ecosphere* **2**,  
800 doi:10.1890/es11-00186.1 (2011).
- 801 140 Gregory, R. D., Skorpilova, J., Vorisek, P. & Butler, S. An analysis of trends, uncertainty and  
802 species selection shows contrasting trends of widespread forest and farmland birds in Europe.  
803 *Ecological Indicators* **103**, 676-687, doi:10.1016/j.ecolind.2019.04.064 (2019).
- 804 141 Leung, B. *et al.* Clustered versus catastrophic global vertebrate declines. *Nature* **588**, 267-271,  
805 doi:10.1038/s41586-020-2920-6 (2020).

- 806 142 Santini, L. *et al.* Assessing the suitability of diversity metrics to detect biodiversity change. *Biological Conservation* **213**, 341-350, doi:10.1016/j.biocon.2016.08.024 (2017).  
807
- 808 143 van Strien, A. J., Soldaat, L. L. & Gregory, R. D. Desirable mathematical properties of indicators for biodiversity change. *Ecological Indicators* **14**, 202-208, doi:10.1016/j.ecolind.2011.07.007 (2012).  
809
- 810 144 Auger-Méthé, M. An introduction to state-space modeling of ecological time series. *arXiv preprint*,  
811 doi:arXiv:2002.02001 (2020).
- 812 145 Daskalova, G. N., Myers-Smith, I. H. & Godlee, J. L. Rare and common vertebrates span a wide  
813 spectrum of population trends. *Nat Commun* **11**, 4394, doi:10.1038/s41467-020-17779-0 (2020).
- 814 146 Bland, L. M., Collen, B., Orme, C. D. & Bielby, J. Predicting the conservation status of data-deficient  
815 species. *Conserv Biol* **29**, 250-259, doi:10.1111/cobi.12372 (2015).
- 816 147 Jaspers, A. Can a single index track the state of global biodiversity? *Biological Conservation* **246**,  
817 108524, doi:10.1016/j.biocon.2020.108524 (2020).
- 818 148 Martin, L. J., Blossey, B. & Ellis, E. Mapping where ecologists work: biases in the global distribution  
819 of terrestrial ecological observations. *Frontiers in Ecology and the Environment* **10**, 195-201,  
820 doi:10.1890/110154 (2012).
- 821 149 Collins, A. C., Böhm, M. & Collen, B. Choice of baseline affects historical population trends in  
822 hunted mammals of North America. *Biological Conservation* **242**, doi:10.1016/j.biocon.2020.108421  
823 (2020).
- 824 150 Navarro, M. & Tidball, K. G. Challenges of biodiversity education: A review of education strategies  
825 for conserving biodiversity. *International Electronic Journal of Environmental Education* **2**, 13–30  
826 (2012).
- 827 151 Carrington, D. *Humanity has wiped out 60% of animal populations since 1970, report finds*,  
828 <[https://www.theguardian.com/environment/2018/oct/30/humanity-wiped-out-animals-since-1970-  
829 major-report-finds](https://www.theguardian.com/environment/2018/oct/30/humanity-wiped-out-animals-since-1970-major-report-finds)> (2018).
- 830 152 O'Neill, S. & Nicholson-Cole, S. "Fear won't do it": Promoting positive engagement with climate  
831 change through visual and iconic representations. *Science Communication* **30**, 355-379,  
832 doi:10.1177/1075547008329201 (2009).
- 833 153 Freeman, R. *The Living Planet Index – data analysis, clusters and biodiversity loss*,  
834 <[https://www.zsl.org/blogs/science/the-living-planet-index--data-analysis-clusters-and-biodiversity-  
835 loss](https://www.zsl.org/blogs/science/the-living-planet-index--data-analysis-clusters-and-biodiversity-loss)> (2020).
- 836 154 Puurtinen, M., Elo, M. & Kotiaho, J. S. The Living Planet Index does not measure abundance.  
837 *Nature* **601**, E14-E15, doi:10.1038/s41586-021-03708-8 (2022).
- 838 155 Buschke, F. T., Hagan, J. G., Santini, L. & Coetzee, B. W. T. Random population fluctuations bias  
839 the Living Planet Index. *Nature Ecology & Evolution* **5**, 1145-1152, doi:10.1038/s41559-021-01494-  
840 0 (2021).
- 841 156 Ritchie, H. *Living Planet Index*, <<https://ourworldindata.org/living-planet-index>> (2021).
- 842 157 Hochkirch, A. *et al.* A strategy for the next decade to address data deficiency in neglected  
843 biodiversity. *Conserv Biol* **35**, 502-509, doi:10.1111/cobi.13589 (2021).
- 844 158 Outhwaite, C. L., Gregory, R. D., Chandler, R. E., Collen, B. & Isaac, N. J. B. Complex long-term  
845 biodiversity change among invertebrates, bryophytes and lichens. *Nature Ecology & Evolution* **4**,  
846 384-392, doi:10.1038/s41559-020-1111-z (2020).



- 847 159 Pocock, M. J. O., Logie, M. W., Isaac, N. J. B., Outhwaite, C. L. & August, T. Rapid assessment of  
848 the suitability of multi-species citizen science datasets for occupancy trend analysis. *bioRxiv*,  
849 813626, doi:10.1101/813626 (2019).
- 850 160 van Strien, A. J., van Swaay, C. A. M., van Strien-van Liempt, W. T. F. H., Poot, M. J. M. &  
851 WallisDeVries, M. F. Over a century of data reveal more than 80% decline in butterflies in the  
852 Netherlands. *Biological Conservation* **234**, 116-122, doi:10.1016/j.biocon.2019.03.023 (2019).
- 853 161 Cardoso, P., Stoev, P., Georgiev, T., Senderov, V. & Penev, L. Species Conservation Profiles  
854 compliant with the IUCN Red List of Threatened Species. *Biodivers Data J*, e10356,  
855 doi:10.3897/BDJ.4.e10356 (2016).
- 856 162 Grames, E. *et al.* Trends in global insect abundance and biodiversity: A community-driven  
857 systematic map protocol. *Open Science Framework (osf.io/uxk4a)* doi:10.17605/OSF.IO/Q63UY  
858 (2019).
- 859 163 Amano, T. *et al.* Tapping into non-English-language science for the conservation of global  
860 biodiversity. *bioRxiv*, doi:10.1101/2021.05.24.445520 (2021).
- 861 164 McRae, L., Deinet, S. & Freeman, R. LPI\_LPR2016data\_public.csv. *Figshare. Dataset*,  
862 doi:<https://doi.org/10.6084/m9.figshare.4300022.v1> (2016).
- 863 165 UNEP-WCMC & IUCN. *Protected Planet*, <<https://www.protectedplanet.net/en>> (2021).
- 864 166 Jellesmark, S. *et al.* A counterfactual approach to measure the impact of wet grassland  
865 conservation on U.K. breeding bird populations. *Conserv Biol* **35**, 1575-1585,  
866 doi:10.1111/cobi.13692 (2021).
- 867 167 Salafsky, N. *et al.* A standard lexicon for biodiversity conservation: unified classifications of threats  
868 and actions. *Conserv Biol* **22**, 897-911, doi:10.1111/j.1523-1739.2008.00937.x (2008).
- 869 168 Butchart, S. H. *et al.* Improvements to the Red List Index. *PLoS One* **2**, e140,  
870 doi:10.1371/journal.pone.0000140 (2007).
- 871 169 Hill, S. L. L. *et al.* Worldwide impacts of past and projected future land-use change on local species  
872 richness and the Biodiversity Intactness Index. *bioRxiv*, doi:10.1101/311787 (2018).
- 873 170 Soto-Navarro, C. A. *et al.* Building a Multidimensional Biodiversity Index – A scorecard for  
874 biodiversity health. Project report. (UN Environment Programme World Conservation Monitoring  
875 Centre (UNEP-WCMC), Cambridge, UK and Luc Hoffmann Institute (LHI), Gland, Switzerland.,  
876 2020).
- 877 171 Soto-Navarro, C. A. *et al.* Towards a multidimensional biodiversity index for national application.  
878 *Nature Sustainability* **4**, 933-942, doi:10.1038/s41893-021-00753-z (2021).
- 879
